# Supplementary material for: Refined Capsid Structure of Human Adenovirus D26 at 3.4 Å Resolution
Source: Viruses. 2022 Feb 17;14(2):414. doi: 10.3390/v14020414 (PMC8878492; doi:10.3390/v14020414)
Supplement: Supplementary file 1 [file viruses-14-00414-s001.zip › viruses-1537909-supplementary.pdf]

## **Supplementary Information**

### **Refined capsid structure of human adenovirus D26 at 3.4 Å resolution**

Vijay S. Reddy<sup>1\*</sup>, Xiaodi Yu<sup>1§</sup> and Michael A. Barry<sup>2,3,4,5</sup>

<sup>1</sup>Department of Integrative Structural and Computational Biology, The Scripps Research Institute, La Jolla, CA 92037, USA

<sup>2</sup>Division of Infectious Diseases, <sup>3</sup>Department of Medicine, <sup>4</sup>Department of Immunology,

<sup>5</sup>Department of Molecular Medicine, Mayo Clinic, Rochester, MN 55905, USA

<sup>2</sup>Department of Internal Medicine, Division of Infectious Diseases, Mayo Clinic, Rochester, MN 55902, USA

§Current address: SMPS, Janssen Research and Development, Spring House, PA 19044, USA

\*Corresponding author:

Vijay S. Reddy, E-mail: [reddyv@scripps.edu](mailto:reddyv@scripps.edu)

**Table S1.** Sequence identity and structural similarity (RMSD) values for VIII pairs in selected HAdVs.

| HAdV | Ad26         | Ad5 (PDB-ID: 6B1T) | Ad41 (PDB-ID: 6Z7N) |
|------|--------------|--------------------|---------------------|
| Ad26 | 100 (0)      | 77.5 (0.61)        | 81.5 (0.81)         |
| Ad5  | 77.5 (0.61)* | 100 (0)            | 79.3 (0.73)         |
| Ad41 | 81.5 (0.81)  | 79.3 (0.73)        | 100 (0)             |

\*Shown in parenthesis are root mean square deviation (RMSD) values for aligned and pruned C-alpha atom pairs estimated using ChimeraX [30].

**Table S2.** Cryo-EM data and model quality statistics of HAdV-D26 virion.

|                                                        |                 |
|--------------------------------------------------------|-----------------|
| <b>Data collection</b>                                 |                 |
| Microscope                                             | FEI Titan Krios |
| Camera                                                 | Gatan K2 Summit |
| Voltage (kV)                                           | 300             |
| Total dose (e-/Å <sup>2</sup> )                        | 53              |
| Pixel size                                             | 1.31 Å          |
| Defocus range (mm)                                     | 0.8-3.0         |
| Micrographs                                            | 2,017           |
| Particles selected                                     | 37,026          |
| Particles included in final reconstruction             | 30,834          |
| <b>Reconstruction</b>                                  |                 |
| Symmetry imposed                                       | I               |
| Resolution (Å)<br>(FSC cut-off: 0.143)                 | 3.38            |
| <b>Virion model composition and quality statistics</b> |                 |
| Number of chains                                       | 31              |
| Number of atoms                                        | 105,674         |
| Number of protein residues                             | 13,365          |
| Clash score                                            | 15.25           |
| Rotamer outliers                                       | 12.26           |
| Molprobit score                                        | 3.14            |
| EMRinger Score                                         | 2.81            |
| Map-Model CC (main chain)                              | 0.83            |
| Map-Model CC (side chain)                              | 0.81            |
| <b>Ramachandran statistics</b>                         |                 |
| Favored                                                | 86.62 %         |
| Allowed                                                | 13.21 %         |
| Outliers                                               | 0.17%           |
| <b>R.M.S. Deviations</b>                               |                 |
| Bond lengths (Å)                                       | 0.007           |
| Bond angles (°)                                        | 0.769           |

CLUSTAL 2.1 multiple sequence alignment

```

Ad26_Hexon|Q3S8B3      MATPSMMPQWAYMHIAGQDASEYLSPLGVQFARATDTYFSLGNKFRNPTVAPTHDVTDR
Ad5_Hexon|P04133      MATPSMMPQWSYMHISGDASEYLSPLGVQFARATETYFSLNNKFRNPTVAPTHDVTDR
*****:****:*****:*****:*****:*****:*****:*****

Ad26_Hexon|Q3S8B3      SQRLTLRFVPVDREATTYLYKARFTLAVGDNRVLDMASTYFDIRGVLDRGPSFKPYSGTA
Ad5_Hexon|P04133      SQRLTLRFIPVDREDTAYSYKARFTLAVGDNRVLDMASTYFDIRGVLDRGPTFKPYSGTA
*****:***** *: * *****:*****:*****:*****:*****
                                HVR1
Ad26_Hexon|Q3S8B3      YNSLAPKGA PNPSQWETKEKQGTG-----VQQEKDVTKTFGVAATGGINIT
Ad5_Hexon|P04133      YNALAPKGA PNPCWEDEAATALEINLEEDDDNEDEVDQAEQQKTHVFGQAPYSGINIT
**:*:*****:***: . . . . . * *: * *: * * . *****

Ad26_Hexon|Q3S8B3      NQGLLLGTDETAENGKKDIYADKTFQPEPQVGEENWQENEFYGG-RALKKDTMKMKPCYG
Ad5_Hexon|P04133      KEGIQIG-----VEGQTPKYADKTFQPEPQIGESQWYETEINHAAGRVLKTTMPMKPCYG
*: *: * *: * *****:***: * * * . . . * * * * * * * *

Ad26_Hexon|Q3S8B3      SFARPTNEKGGQAKFKPVNEGEQPKDLIDFAYFDVPGGSPAGSGSEYKADII LYTEN
Ad5_Hexon|P04133      SYAKPTNENGQGILVKQNGKLESQVEMQFFSTTEATAG-----NGDNLTPKVVL YSED
*: *: *****:***: . *: *: . : : : : * . . . . . *: * . : : : * *:

Ad26_Hexon|Q3S8B3      VNLETPDTHVVKPGTSDNSSEINLVQQSMPNRPNYIGFRDNFVGLMYNSTGNMGVLAG
Ad5_Hexon|P04133      VDIETPDTHISYMPITKEGNSRELMGQQSMPNRPNYIAFRDNFIGLMYNSTGNMGVLAG
*: *: *****: * * . : . . . . : *****:*****:*****:*****

Ad26_Hexon|Q3S8B3      QASQLNAVVDLQDRNTELSYQLLLDSLGDRTYFMSWNSAVDSYDPDVRI IENHGVEDEL
Ad5_Hexon|P04133      QASQLNAVVDLQDRNTELSYQLLLDSLGDRTYFMSWNSAVDSYDPDVRI IENHGTEDEL
*****:*****:*****:*****:*****:*****:*****:*****

Ad26_Hexon|Q3S8B3      PNYCFPLNGTGTNSTYQGVKITNGNDGAESEWEKDDAISRQNI CKGNVYAMEINLQAN
Ad5_Hexon|P04133      PNYCFPLGGVINTETLT KVVKPTGQ---ENGWEKDATEFSDKNEIRVGNNFAMEINLNAN
*****: * . . . * ** . *: * : . . . : * : * * * :*****: *

Ad26_Hexon|Q3S8B3      LWKSFLYSNVALYLPDSYKYTPANVKLPANTNTY EYMNGRVVAPSLVDAYINIGARWSLD
Ad5_Hexon|P04133      LWRNFLYSNIALYLPDKLKYSPSNVKISDNPN TYDMNKRVVAPGLVDYINIGARWSLD
**:*:*****:*****: **:*:***: . * :***:*** *****:***:*****

Ad26_Hexon|Q3S8B3      PMDNVNPFNHPRNAGLRYRSMLLGNGRYVPFHIQVPQKFFAIKNLLLLPGSYTYEWNFRK
Ad5_Hexon|P04133      YMDNVNPFNHHRNAGLRYRSMLLGNGRYVPFHIQVPQKFFAIKNLLLLPGSYTYEWNFRK
***** *****:*****:*****:*****:*****:*****:*****

Ad26_Hexon|Q3S8B3      DVNMILQSSSLGNDLRVDGASVRFDSVNL YATFFPMAHNTASTLEAML RNDTHDQSFNDYL
Ad5_Hexon|P04133      DVNMVLQSSSLGNDLRVDGASIKFDSICLYATFFPMAHNTASTLEAML RNDTNDQSFNDYL
***:*****:*****:***: *****:*****:*****:*****

Ad26_Hexon|Q3S8B3      SAANMLYPIPAKATNVPI SIPS RNWAAFRGWSFTRLKTKETPSLGS GFDPPYVYSGSIPY
Ad5_Hexon|P04133      SAANMLYPIPANATNVPI SIPS RNWAAFRGWAFTRLKTKETPSLGS GYDPYTYSGSIPY
*****:*****:*****:*****:*****:*****:***: . *****

Ad26_Hexon|Q3S8B3      LDGTFYLNHTFKKVSIMFDSSVSWPGNDRLLTPNEFEIKRSVDGEGYNVAQC NMTKDWFL
Ad5_Hexon|P04133      LDGTFYLNHTFKKVAITFDSSVSWPGNDRLLTPNEFEIKRSVDGEGYNVAQC NMTKDWFL
*****:*****: * *****:*****:*****:*****:*****:*****

Ad26_Hexon|Q3S8B3      VQMLSHYNIGYQG FHVPEGYKDRMYSFFRNFPQMSRQVVDEIN YKDYKAVTLPFQHNNSG
Ad5_Hexon|P04133      VQMLANYNIGYQGFYIPESYKDRMYSFFRNFPQMSRQVVDDTKYKDYQQV GILHQHNNSG
***:*****:***:*****:*****:*****:*****: * : . *****

Ad26_Hexon|Q3S8B3      FTGYLAPTRMQGPYPANFPYPLIGQTAVPSVTQKKFLCDRVMWRIPFSSNFMSMGALTD
Ad5_Hexon|P04133      FVGYLAPTRMREGQAYPANFPYPLIGKTAVDSITQKKFLCDRTLWRIPFSSNFMSMGALTD
* .*****: * . *****:*** * :*****: . :*****:*****

Ad26_Hexon|Q3S8B3      LGQNMLYANSAHALDMT FEVDPMDEPTLLYL LFEVFDVVRVHQPHRGVIEAVYL RTPFSA
Ad5_Hexon|P04133      LGQNLLYANSAHALDMT FEVDPMDEPTLLYVL LFEVFDVVRVHRPHRGVIETVYL RTPFSA
***:*****:*****:*****:*****:*****:*****:*****:*****

Ad26_Hexon|Q3S8B3      GNATT
Ad5_Hexon|P04133      GNATT
*****

```

Figure S1. Amino acid sequence alignments of hexon subunits from Ad26 and Ad5 viruses

CLUSTAL 2.1 multiple sequence alignment

```

Ad26_PB|A4ZKL2      -MRRVAVSSSPPPSYESVMAQA-----TLEVPFVPPRYMAPTEGRNSIRYSEL
Ad5_PB|P12538      MRRAAMYEEGPPPSYESVVSAAEVAAALGSPFDAPLDPPFVPPRYLRPTGGRNSIRYSEL
                   * *: ...*****: * *: *****: * *****

Ad26_PB|A4ZKL2      APQYDTRVYLVNKSADIASLNYQNDHSNFLTTVVQNNDFTPAEASTQTINFDERSRWG
Ad5_PB|P12538      APLFDTRVYLVNKSSTDVASLNYQNDHSNFLTTVIQNNDYSPGEASTQTINLDDRSHWG
                   ** :*****: ** :*****:*****: * :*****: * :**

Ad26_PB|A4ZKL2      GDLKTILHTNMPNVNEYMFTSKFKARVMVSRKHPEGVVETDLSQDKLEYEWFETLPEGN
Ad5_PB|P12538      GDLKTILHTNMPNVNEFMFTNKFARVMVSRLPK-----DNQVELKYEWFETLPEGN
                   *****:***.*****. : * :*:***.*****

Ad26_PB|A4ZKL2      FSETMTIDLNNAILENYLQVGRQNGVLES DIGVKFDSRNFKLGWDPVTKLVMPGVYTYE
Ad5_PB|P12538      YSETMTIDLNNAIVEHYLKVGRQNGVLES DIGVKFDRNFRFGDPVTGLVMPGVYTNE
                   :*****: * :*:*****:*****: * :*: * *****

Ad26_PB|A4ZKL2      AFHPDVVLLPGCGVDFTESRLSNLLGIRKKQPFQEGFRIMYEDLEGGNIPALLDVPKYLE
Ad5_PB|P12538      AFHPDIILLPGCGVDFTHSRLSNLLGIRKKQPFQEGFRITYDDLEGGNIPALLDVDAYQA
                   *****:*****.*****:***** * :*****

Ad26_PB|A4ZKL2      SKKKVEDETKNAAAAT-----ADTTTRGDTFATPAQET---
Ad5_PB|P12538      SLKDDTEQGGGAGGSNSSGSGAEENSNAAAAAMQPVEDMNDHAIRGDTFATRAEKRAE
                   * *. : : ...: * : ***** :*.

Ad26_PB|A4ZKL2      -----AADKKVEVLPIEKDESGRSYNLIQG--THDTLYRSWYLSYTYGD
Ad5_PB|P12538      AEAEEAEEAAPAAQPEVEKPKQKKPVIKPLTEDSKKRSYNLISNDSTFTQYRSWYLAYNYGD
                   .: ** : * : :*. *****. : * *****:*.***

Ad26_PB|A4ZKL2      PEKGVQSWTLLTTPDVTGCGAEQVYWSLPDLMQDPVTFRSTQQVSNNYPVVGAEELMPFRAKS
Ad5_PB|P12538      PQTGIRSWTLLCTPDVTGCGSEQVYWSLPDMMQDPVTFRSTRQISNFPVVGAEELPVHKS
                   *: .: :***** *****:*****:*****: * :*:*****:*. : **

Ad26_PB|A4ZKL2      FYNDLAVYSQLIRSYTSLTHVFNRFDPNQILCRPPAPTITTVSENVPALTDHGTLPLRSS
Ad5_PB|P12538      FYNDQAVYSQLIRQFTSLTHVFNRFPENQILARPPAPTITTVSENVPALTDHGTLPLRNS
                   **** *****. :*****:*****.*****:*****.*****

Ad26_PB|A4ZKL2      IRGVQRVTITDARRRTPYVYKALGIVAPRVLSSRTF
Ad5_PB|P12538      IGGVQRVTITDARRRTPYVYKALGIVSPRVLSSRTF
                   * *****:*****:*****

```

Figure S2. Amino acid sequence alignments of penton base (PB) subunits from Ad26 and Ad5 viruses

**A**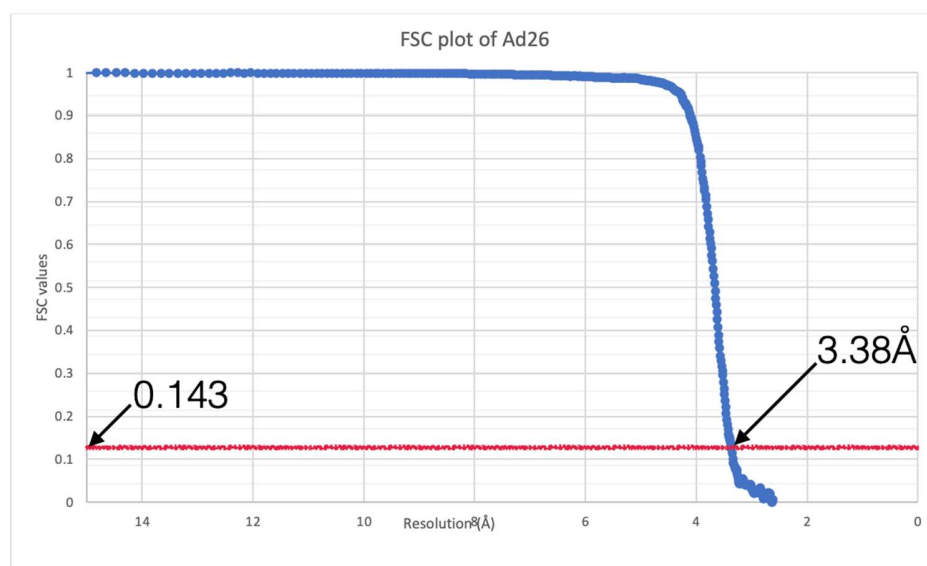**B**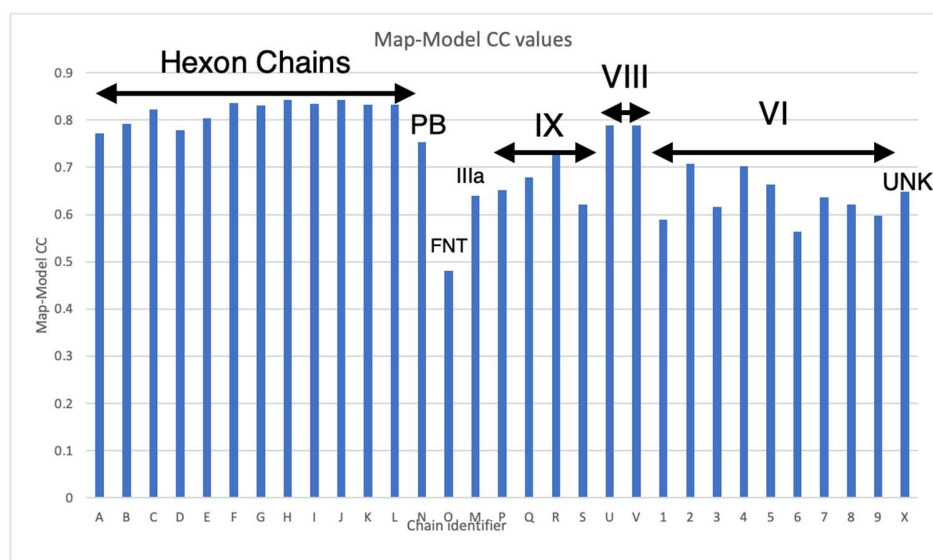

**Figure S3.** (A) FSC plot showing the resolution estimation of the cryo-EM reconstruction of HAdV-D26 (Ad26) virion. The partial FSC values used in the graph as a function of resolution were calculated in cisTEM [60]. (B) A bar plot of map-to-model correlation coefficient (CC) values for individual chains reported in the structure of Ad26 virion. The corresponding capsid proteins of the individual chains are identified at the top the bars. The average map-to-model CC values for all the main chain and side chain atoms are 0.83 and 0.81, respectively. The map-to-model CCs were calculated in Phenix [9].
